# Supplementary material
Source: PubMed Central journal article supplement (PMC2268799)
Supplement: pnas_0800255105_1.pdf [file pnas_0800255105_1.pdf]

|                      |                                                                    |      |
|----------------------|--------------------------------------------------------------------|------|
| 92UGgp140-Fd         | -----EESQKQEQEKNEQELLE <b>LDKWANL</b> WN <b>NWFDIS</b> NWLWYIK---- | Fd   |
| HXB2gp41interf       | -----EESQNQEQEKNEQELLE <b>LDKWASL</b> WN <b>NWFNIT</b> NWLWYIK---- | GCN4 |
| 92UGgp41inter        | -----EESQKQEQEKNEQELLE <b>LDKWANL</b> WN <b>NWFDIS</b> NWLWYIK---- | Fd   |
| 92UGgp41post         | -----EESQKQEQEKNEQELLE <b>LDKWANL</b>                              |      |
| 2F5 epitope peptide  | ELLE <b>LDKWASL</b>                                                |      |
| 4E10 epitope peptide | SLWN <b>NWFNIT</b> NWLWYIK                                         |      |
